# Supplementary material for: Shrinking the Variance in Experts’ “Classical” Weights Used in Expert Judgment Aggregation
Source: MDPI journal article supplement (doi:10.3390/forecast5030029), 2023-08-23
Supplement: s1 [file s1]

Archive with 2 entries (2 files):
- Deriving_weights_using_20_seed_questions.pdf
- Double_shrinkage_estimator.pdf
